# Supplementary material for: An alcohol-soluble and ion-free electron transporting material functionalized with phosphonate groups for solution-processed multilayer PLEDs
Source: Royal Society of Chemistry journal article supplement (doi:10.1039/c6cc06435c), 2016-01-01
Supplement: c6cc06435c1.pdf [file c6cc06435c1.pdf]

## Supporting Information

# **An alcohol-soluble and ion-free electron transport material functionalized with phosphonate groups for solution- processed multilayer PLEDs**

*Bo Chen<sup>a, b</sup>, Lei Zhao<sup>a</sup>, Junqiao Ding<sup>a</sup>, Lixiang Wang<sup>a</sup>, Xiabin Jing<sup>a</sup> and Fosong Wang<sup>a</sup>*

<sup>a</sup> State Key Laboratory of Polymer Physics and Chemistry, Changchun Institute of Applied Chemistry, Chinese Academy of Sciences, Changchun, 130022, P. R. China

<sup>b</sup> University of Chinese Academy of Sciences, Beijing 100039, P. R. China

---

## Table of contents

|                                                                                                        |       |
|--------------------------------------------------------------------------------------------------------|-------|
| 1. General information                                                                                 | 2     |
| 2. Device fabrication and characterization conditions                                                  | 2     |
| 3. Synthesis                                                                                           | 3     |
| 4. <sup>1</sup> H, <sup>13</sup> C and <sup>31</sup> P NMR spectra and MALDI-TOF mass spectrum of TPPO | 5-8   |
| 5. Cyclic voltammetry plot of TPPO in acetonitrile solution                                            | 9     |
| 6. TGA and DSC curves of TPPO                                                                          | 10    |
| 7. Table of the photophysical, electrochemical and thermal properties of TPPO                          | 11    |
| 8. AFM images of TPPO film before and after annealing                                                  | 12    |
| 9. Device performance                                                                                  | 13-18 |

---

## General Information

$^1\text{H}$  NMR spectra,  $^{13}\text{C}$  NMR and  $^{31}\text{P}$  NMR spectrum were recorded at room temperature on a Bruker Avance 300 NMR spectrometer.  $^{31}\text{P}$  NMR spectrum was referenced to external 85 %  $\text{H}_3\text{PO}_4$  (sealed in capillary tube, 0 ppm). Elementary analysis was carried on a Bio-Rad elemental analysis system. MALDI-TOF mass spectrum was performed on an AXIMA CFR MS apparatus (COMPACT). UV-visible absorption spectrum and photoluminescence spectrum was recorded on Perkin-Elmer Lambda 35 UV-vis spectrometer and Perkin-Elmer LS 50B spectrofluorometer, respectively. Thermal gravimetric analysis (TGA) and differential scanning calorimetry (DSC) were performed under a flow of nitrogen with Perkin-Elmer-TGA 7 and Perkin-Elmer-DSC 7 system, respectively, at a scanning rate of 10 °C/min. AFM characterization was performed on a SPA300HV with a SPI3800N controller (Seiko Instruments, Inc., Japan) in tapping mode. Cyclic voltammetry was performed on an EG&G 283 (Princeton Applied Research) potentiostat/galvanostat system. The sample was tested in 1 mM acetonitrile solution using ferrocene as reference under  $\text{N}_2$  atmosphere. The supporting electrolyte was 0.1 M tetrabutylammonium perchlorate ( $n\text{-Bu}_4\text{NClO}_4$ ), and the scanning rate was 100 mV/s.

## Device fabrication and characterization conditions

The substrates were commercial available indium tin oxide (ITO) coated glass with sheet resistance of 10  $\Omega$ /square. The substrates were pre-cleaned carefully, and treated by ozone for 25 min. The PEDOT:PSS solution was spin-coated onto the substrates with a thickness of 40 nm, and baked at 120 °C for 40 min in the air. After baking, the GPF chlorobenzene solution with a concentration of 12 mg/mL was spin-coated onto PEDOT:PSS at the 1.5 krpm for 1 min, and annealed at 80 °C for 30 min. Subsequently, the above TPPO layer was prepared by spin-coating the 6 mg/mL isobutanol solution at the 1.5 krpm for 1min. Except PEDOT:PSS, all the organic layers were assembled under nitrogen atmosphere. Finally, a 1-nm-thick film of LiF and a 100-nm-thick film of Al were vacuum-deposited onto the TPPO layer under the pressure of  $10^{-4}$  Pa, as required. The typical active area of the devices was 0.14 cm<sup>2</sup>. The device performance was tested at room temperature under ambient conditions. The EL spectra were measured by a PR650 spectra

colorimeter. The current - voltage and brightness - voltage curves of devices were measured by using a Keithley 2400/2000 source meter and a calibrated silicon photodiode.

The electron mobility of the neat film was measured using the space-charge-limited-current (SCLC) method. The electron-only device configuration is ITO/Al (100 nm)/TPPO (90 nm)/ LiF (1 nm)/Al (100 nm). The current-voltage curve was recorded using a computer-controlled Keithley 2400 source meter. The electron mobility was calculated according to a simplified space-charge limited function:

$$J = \frac{9}{8} \varepsilon_0 \varepsilon_r \mu \frac{V^2}{L^3}$$

where  $J$  is the current density,  $\varepsilon_0$  is the permittivity of free space,  $\varepsilon_r$  is the relative permittivity of 3 for organic material,  $\mu$  is the zero-field mobility,  $V$  is the potential across the device,  $L$  is the thickness of active layer.

## Synthesis

All chemicals and reagents were used as received from commercial sources without further purification. Solvents for chemical synthesis were purified according to the standard procedures. The intermediates PCz-B[1] and tris(4-bromophenyl)phosphine oxide[2] were prepared according to the literature procedures.

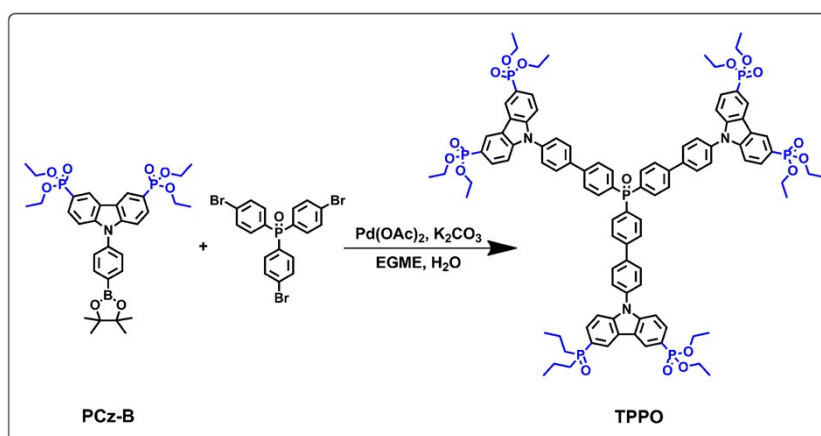

**Scheme S1.** Synthetic route of TPPO.

**TPPO:** To the mixture solvent of 9 mL ethylene glycol mono methyl and 3 mL water, tris(4-bromophenyl)phosphine oxide (0.32 g, 0.63 mmol), PCz-B (1.33 g, 2.07 mmol) and K<sub>2</sub>CO<sub>3</sub> (0.48

---

g, 3.48 mmol) were added. After all the solid was dissolved, Pd(OAc)<sub>2</sub> (9.0 mg, 40.2 μmol) was added to the colorless solution. The color of the solution soon turned into dark brown. After the solution was stirred at r. t. for 3 hours, the solvent was removed by vacuum distillation. The residue solid was further purified by column chromatography on silica (200–300 mesh) with ethyl acetate/methanol ( $V_{\text{ethyl acetate}} : V_{\text{methanol}} = 20 : 1$ ). The final product was obtained as white solid (0.59 g, 52%). <sup>1</sup>H NMR (DMSO-d<sub>6</sub>, 300 MHz, δ): 8.88 (d, 6H,  $J = 13.6$  Hz), 8.13-8.08 (m, 12H), 7.97-7.83 (m, 18H), 7.60 (dd, 6H,  $J_1 = 3.0$  Hz,  $J_2 = 8.5$  Hz), 4.13-4.00 (m, 24H), 1.27 (t, 36H,  $J = 7.1$  Hz). <sup>13</sup>C NMR (DMSO-d<sub>6</sub>, 75 MHz, δ): 143.61 (d,  $J = 2.1$  Hz), 143.51, 139.90, 136.59, 133.46, 133.27 (d,  $J = 10.0$  Hz), 132.09, 130.77 (d,  $J = 11.8$  Hz), 129.86, 128.55, 128.25 (d,  $J = 12.0$  Hz), 126.37 (d,  $J = 10.9$  Hz), 123.18 (d,  $J = 17.5$  Hz), 122.08, 119.56, 111.34 (d,  $J = 15.5$  Hz), 62.43 (d,  $J = 5.2$  Hz), 17.10 (d,  $J = 5.9$  Hz). <sup>31</sup>P NMR (DMSO-d<sub>6</sub>, 121 MHz, δ): 26.15, 20.65. Anal calcd. For C<sub>96</sub>H<sub>102</sub>N<sub>3</sub>O<sub>19</sub>P<sub>7</sub>: C, 63.40; H, 5.65; N, 2.31; Found: C, 63.79; H, 5.98; N, 1.95. Calcd mass: 1818.7; MALDI-TOF mass found ( $m/z$ ): 1818.6 [ $M^+$ ], 1841.6 [ $M + Na^+$ ].

---

[1] Chen, B.; Ding, J. Q.; Wang, L. X.; Jing, X. B.; Wang, F. S. *Chem. Commun.* **2012**, 48, 8970.

[2] Wang, Y.; Ranasinghe, M. I.; Goodson, T. J. *Am. Chem. Soc.* **2003**, 125, 9562.

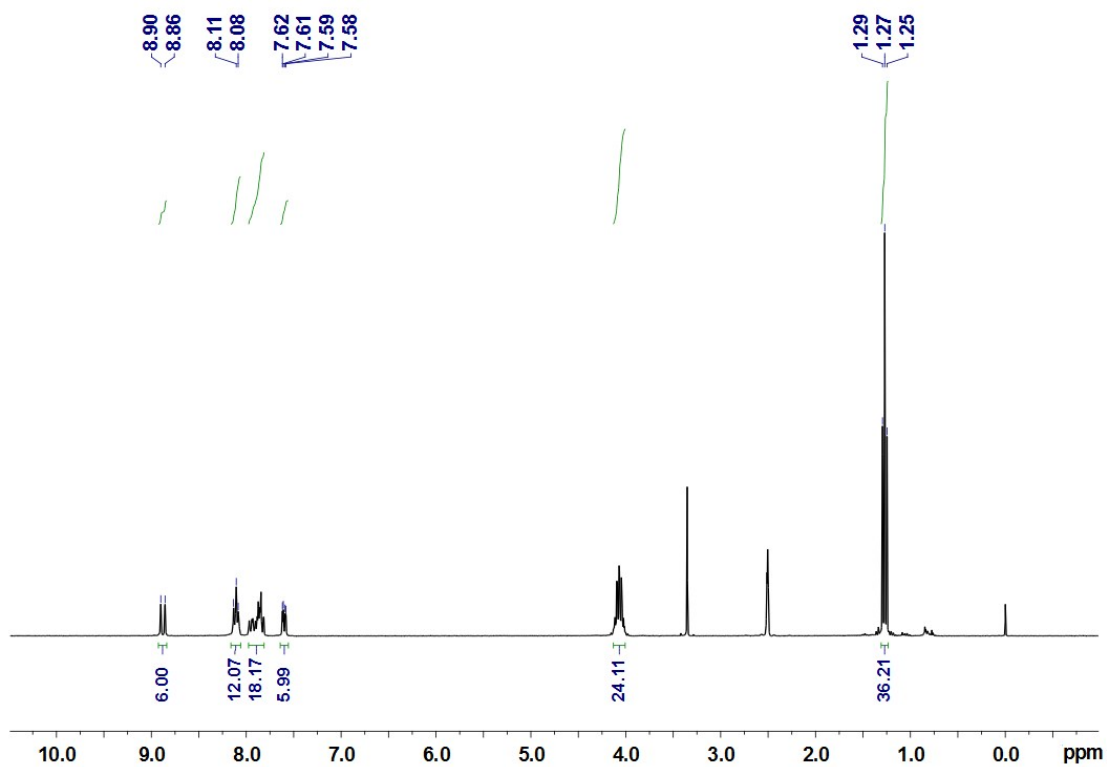

**Fig. S1**  $^1\text{H}$  NMR spectrum of TPPO in  $\text{DMSO-d}_6$ .

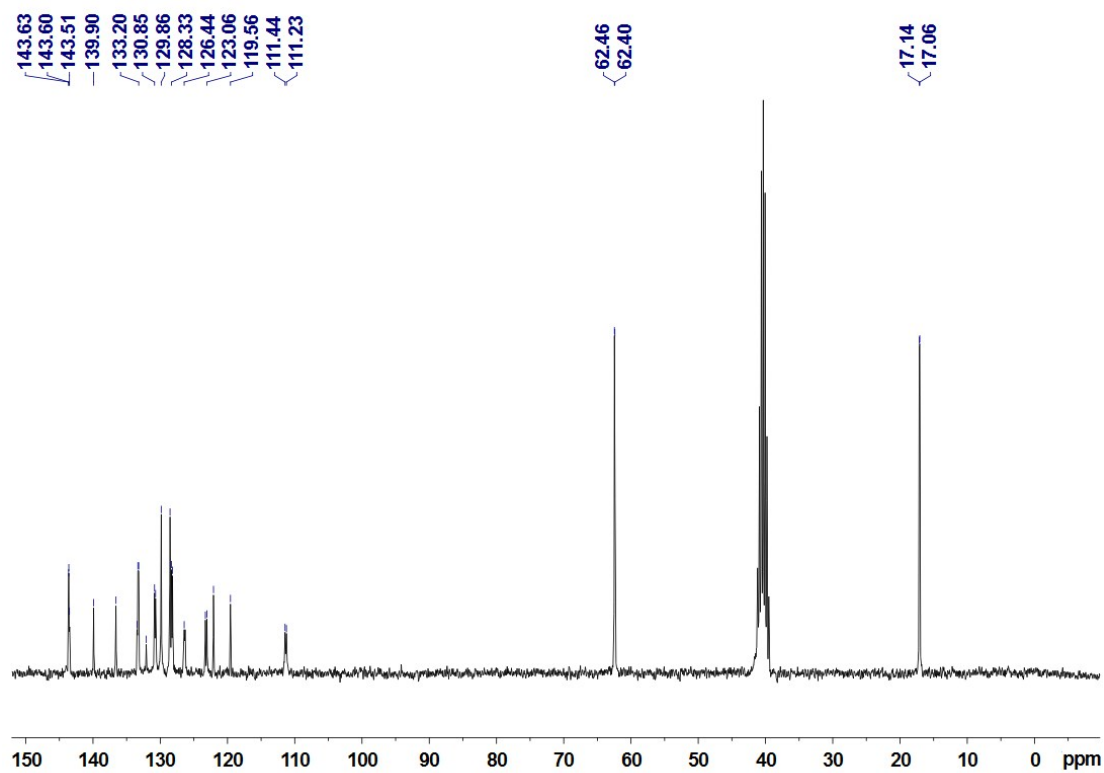

**Fig. S2**  $^{13}\text{C}$  NMR spectrum of TPPO in  $\text{DMSO-d}_6$ .

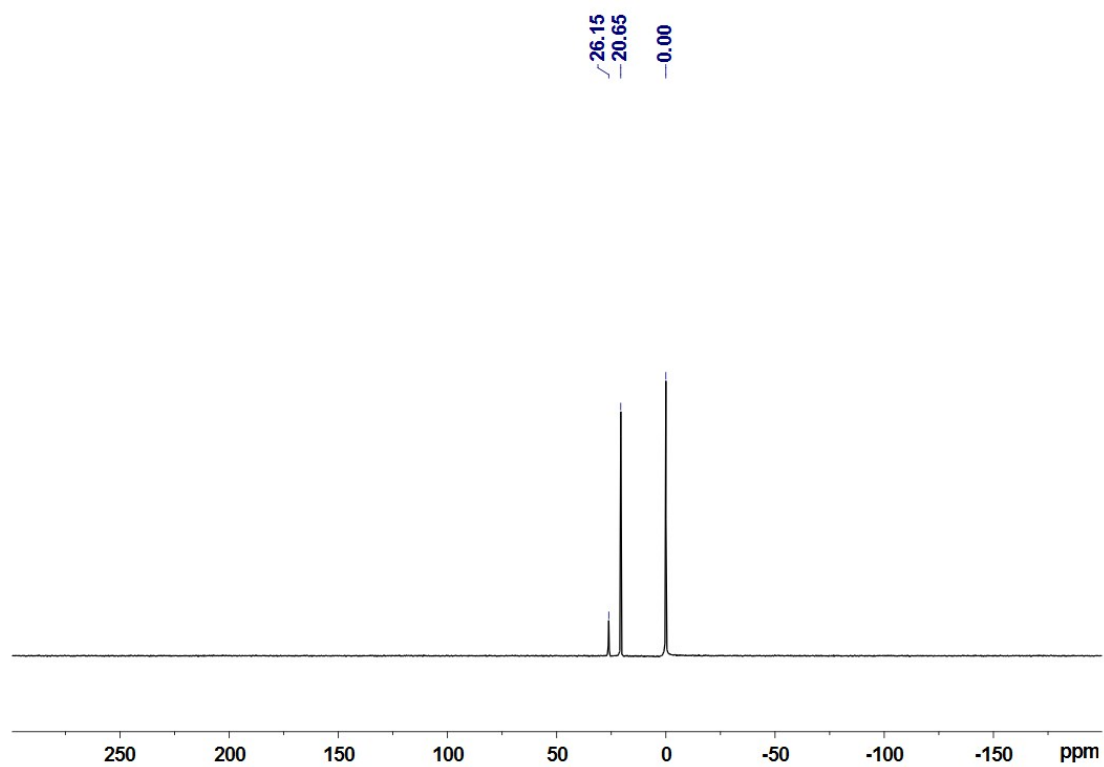

**Fig. S3**  $^{31}\text{P}$  NMR spectrum of TPPO in  $\text{DMSO-d}_6$  (0 ppm, 85% phosphoric acid in sealed capillary tube).

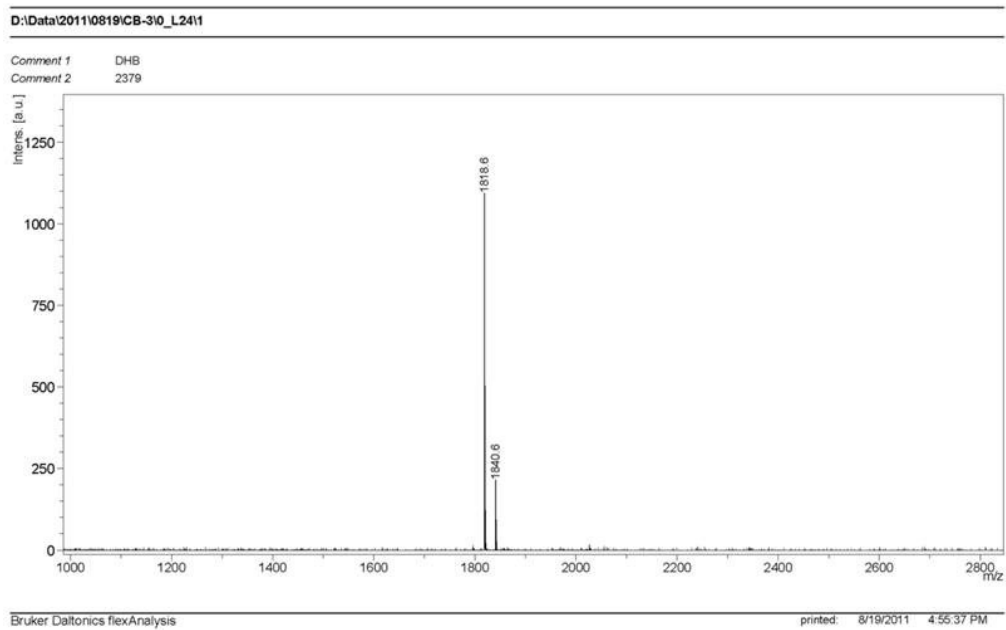

**Fig. S4** The MALDI-TOF mass spectrum of TPPO.



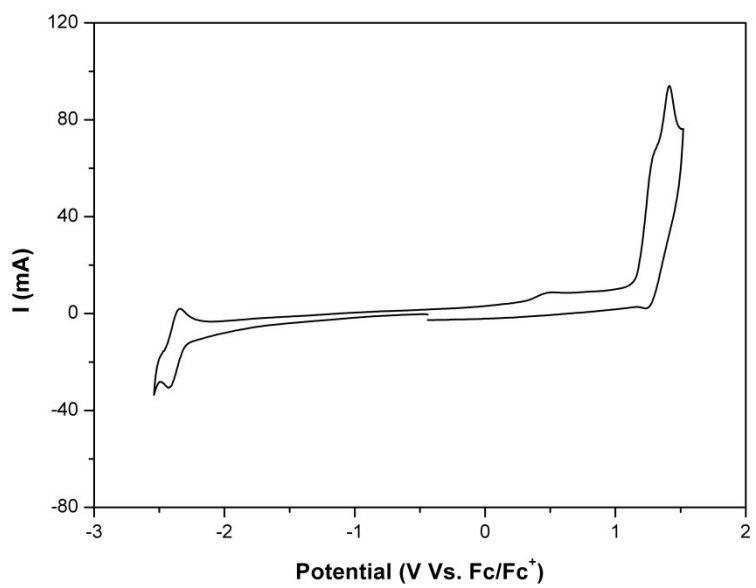

**Fig. S5** Cyclic voltammetry plot of TPPO in acetonitrile solution.

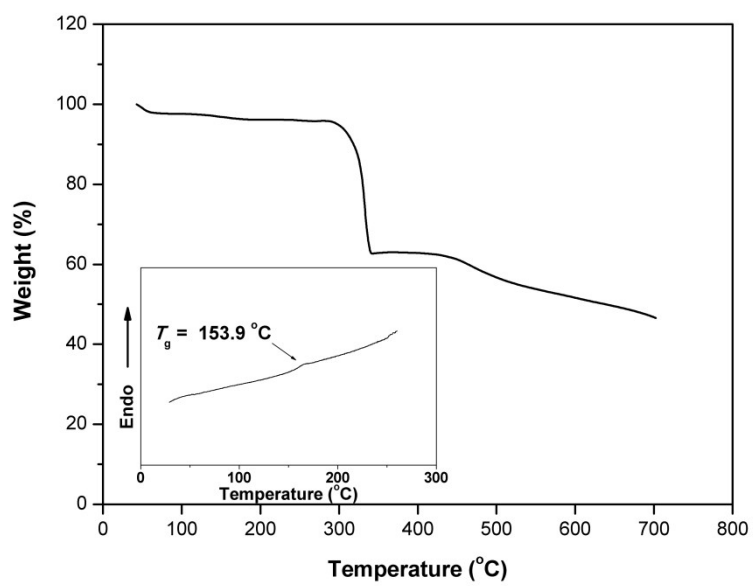

**Fig. S6** TGA and DSC curves (Inset: the second heating cycling) of TPPO

**Table S1** Photophysical, electrochemical and thermal properties of TPPO.

| $\lambda_{\text{abs}} (\log \xi)^a$<br>[nm]              | $\lambda_{\text{max}}^{\text{em}}^b$<br>[nm] | $E_g^c$<br>[eV] | $E_1^d$<br>[eV] | $E_{\text{ox}}^{\text{onset}}^e$<br>[V] | $E_{\text{red}}^{\text{onset}}^e$<br>[V] | HOMO <sup>e</sup><br>[eV] | LUMO <sup>e</sup><br>[eV] | $T_d^f$<br>[°C] | $T_g$<br>[°C] |
|----------------------------------------------------------|----------------------------------------------|-----------------|-----------------|-----------------------------------------|------------------------------------------|---------------------------|---------------------------|-----------------|---------------|
| 243 (5.2), 249 (5.2), 269 (5.2),<br>286 (4.9), 307 (4.8) | 371                                          | 3.49            | 2.65            | 1.16                                    | -2.30                                    | -5.96                     | -2.50                     | 309             | 154           |

<sup>a</sup> Measured in 10<sup>-6</sup> M dichloromethane solution; <sup>b</sup> Measured in 10<sup>-6</sup> M toluene solution; <sup>c</sup> The optical band gap calculated from the onset of the absorption; <sup>d</sup> Measured in 10<sup>-3</sup> M toluene solution; <sup>e</sup> Measured in 10<sup>-3</sup> M acetonitrile solution, with *n*-5 Bu<sub>4</sub>NClO<sub>4</sub> as the electrolyte; <sup>e</sup> Calculated from the equations:  $E_{\text{HOMO}} = -e[E_{\text{ox}}^{\text{onset}} + 4.8 \text{ V}]$ ,  $E_{\text{LUMO}} = -e[E_{\text{red}}^{\text{onset}} + 4.8 \text{ V}]$ ; <sup>f</sup> The temperature of 5 % weight loss.

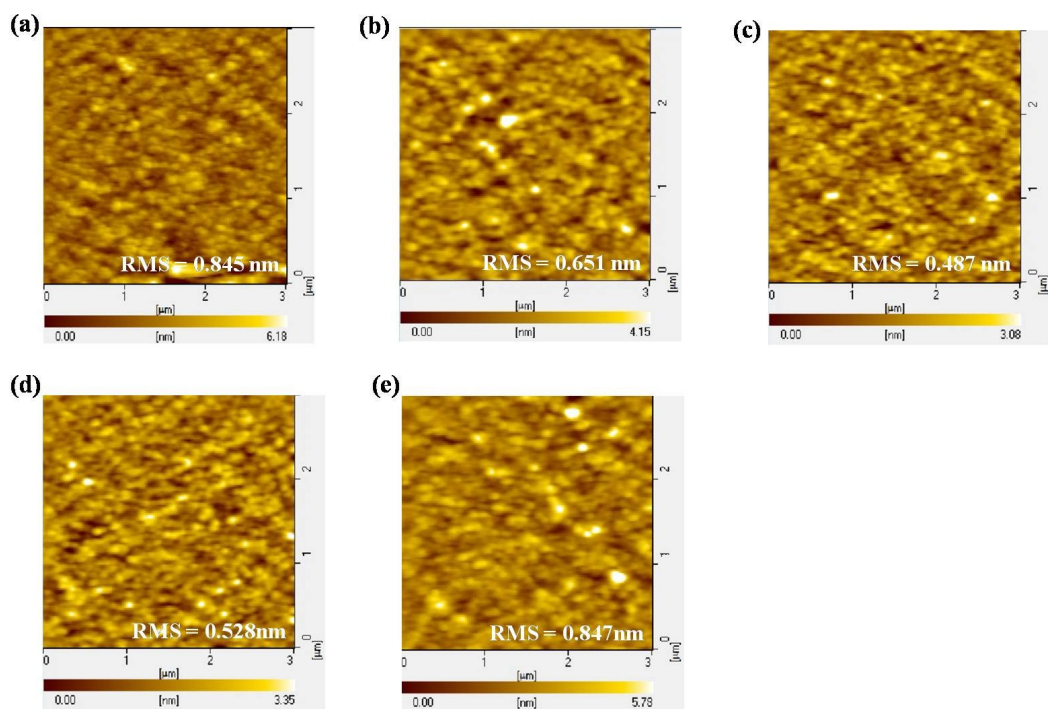

**Fig. S7** AFM surface topographic images for the TPPO film before (a) and after annealing at 120 °C for 1 h (b), 120 °C for 3 h (c), 120 °C for 5 h (d) and 140 °C for 5 h (e).

5

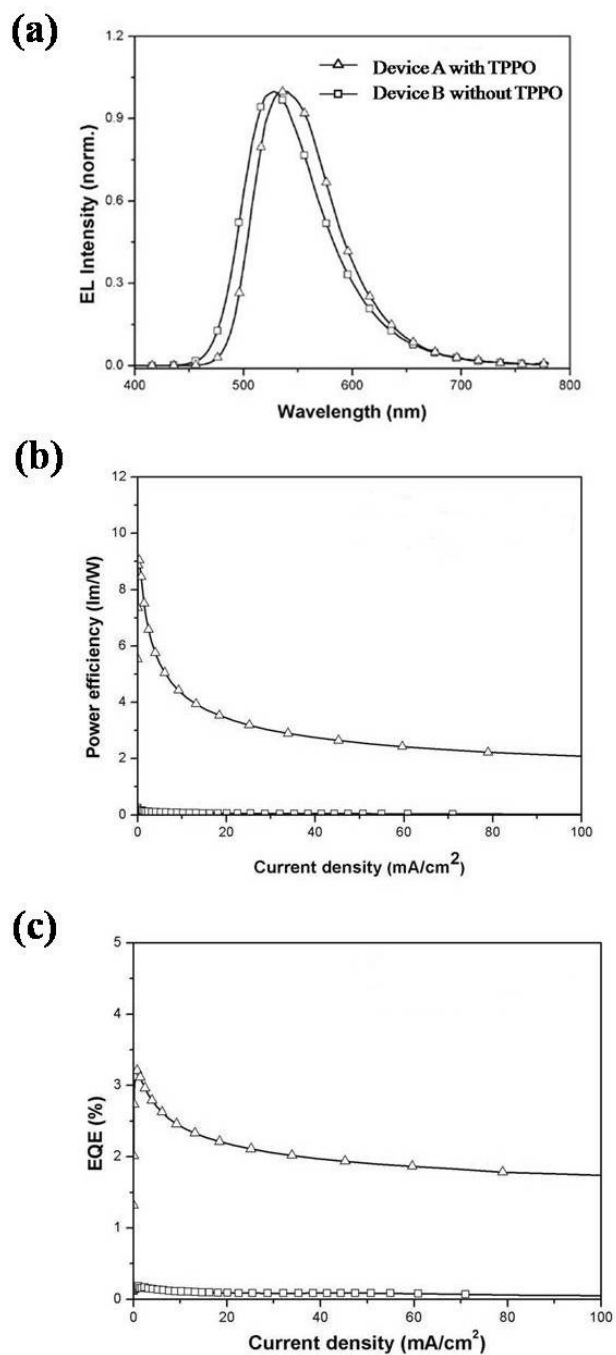

**Fig. S8** EL Spectra (a), power efficiency versus current density (b) and EQE versus current density plots (c) for devices with and without TPPO layer.

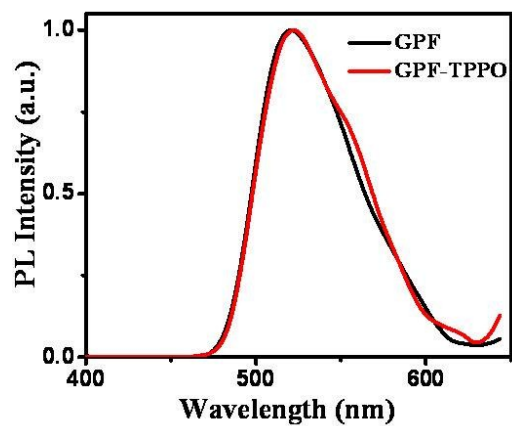

**Fig. S9** Comparison of the PL spectra for the GPF-composed EML before and after spin-coating of the upper TPPO layer.

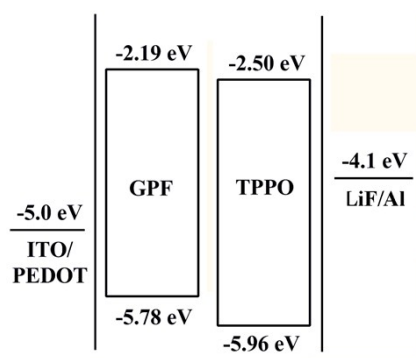

**Fig. S10** Energy level alignment of the multilayer device.

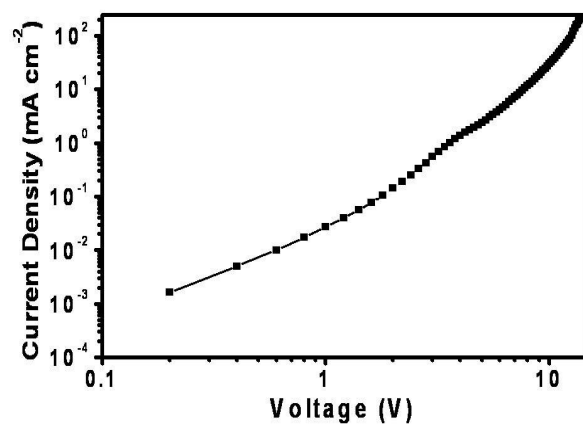

**Fig. S11** Current density-voltage plot of the electron-only device for TPPO.



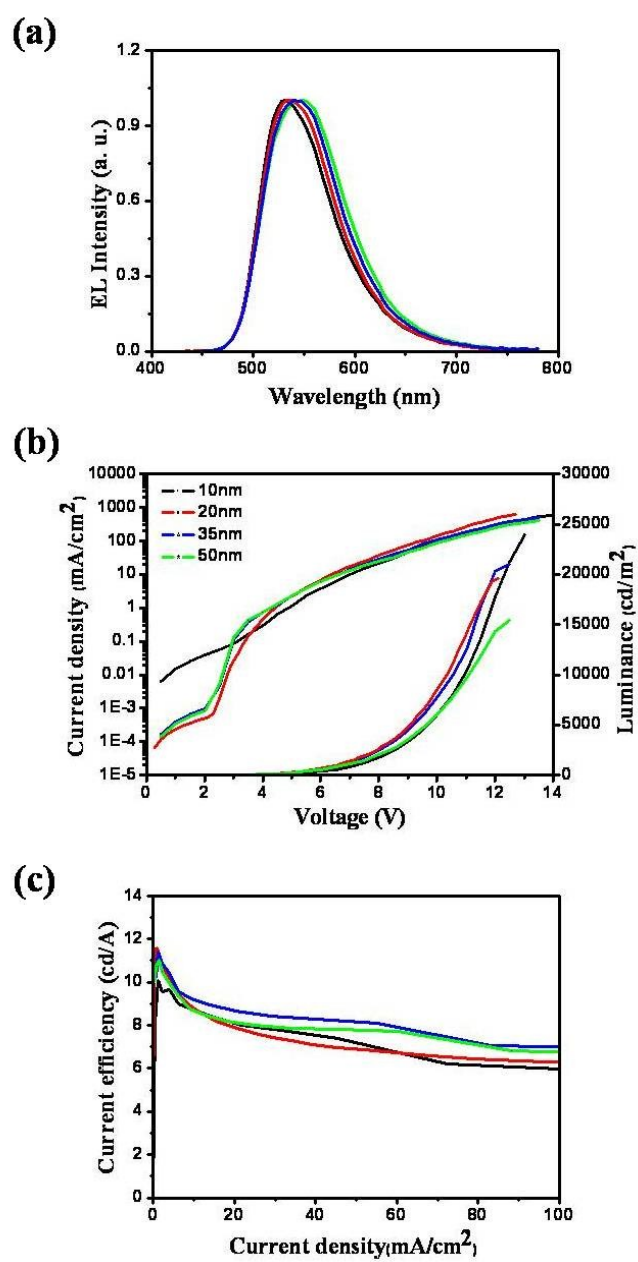

**Fig. S12** The EL spectra (a), current density-voltage-luminance (b) and current efficiency-current density characteristics for solution-processed multilayer PLEDs with different TPPO thickness.

---

**Table S2.** Device performance comparison for solution-processed multilayer PLEDs with different TPPO thickness.

| Thickness<br>[nm] | $V_{\text{on}}$<br>[V] | $L_{\text{max}}$<br>[cd m <sup>-2</sup> ] | $\eta_{\text{c, max}}$<br>[cd A <sup>-1</sup> ] | $\eta_{\text{p, max}}$<br>[lm W <sup>-1</sup> ] | $\text{EQE}_{\text{max}}$<br>[%] | $\lambda_{\text{max}}$<br>[nm] | CIE<br>(x,y) |
|-------------------|------------------------|-------------------------------------------|-------------------------------------------------|-------------------------------------------------|----------------------------------|--------------------------------|--------------|
| 10                | 2.9                    | 24000                                     | 10.0                                            | 6.3                                             | 2.8                              | 531                            | 0.35, 0.60   |
| 20                | 2.9                    | 20000                                     | 11.6                                            | 9.1                                             | 3.2                              | 540                            | 0.36, 0.59   |
| 35                | 2.7                    | 21000                                     | 11.3                                            | 8.0                                             | 3.2                              | 543                            | 0.37, 0.59   |
| 50                | 2.7                    | 15000                                     | 11.0                                            | 7.7                                             | 3.1                              | 551                            | 0.38, 0.58   |
